# Supplementary material for: Effects of Long-Term Feeding of the Polyphenols Resveratrol and Kaempferol in Obese Mice
Source: PLoS One. 2014 Nov 11;9(11):e112825. doi: 10.1371/journal.pone.0112825 (PMC4227868; doi:10.1371/journal.pone.0112825)
Supplement: Table S4 — Differential gene expression obtained by comparing gene expression arrays for HK versus HC mice. (XLSX) [file pone.0112825.s004.xlsx]

## Sheet: Control_VS_A
Differential Expression Analysis: High Kaempferol Diet (HK) Gene Expression / Hypercaloric Diet (HC) Gene Expression, 6 gene-probesets with FDR = 0.15 (≈15% false positives)
nº	probeset ID	d.value	p.value	q.value	R.fold	Genename	Description
1	ENSMUSG00000024248	-646334863456487	4.60656e+08	0.177638135898095	0.740077353681582	Cox7a2l	cytochrome c oxidase subunit VIIa polypeptide 2-like Gene [Source:MGI Symbol;Acc:MGI:106015]
2	ENSMUSG00000037211	-626826661714042	5.02534e+09	0.177638135898095	0.752271985341964	Spry1	sprouty homolog 1 (Drosophila) Gene [Source:MGI (curated);Acc:Spry1-002]
3	ENSMUSG00000068181	-597987199306986	6.70045e+09	0.177638135898095	0.72859151659846	AC125225.4
4	ENSMUSG00000027932	-57876327134794	9.21312e+07	0.177638135898095	0.853352162629546	Slc27a3	solute carrier family 27 (fatty acid transporter), member 3 Gene [Source:MGI (curated);Acc:Slc27a3-001]
5	ENSMUSG00000073700	-566119893308062	0.000100506721386993	0.177638135898095	0.777219198965261	Klhl21	kelch-like 21 (Drosophila) Gene [Source:MGI (curated);Acc:Klhl21-001]
6	ENSMUSG00000037740	-562224748887271	0.000113070061560367	0.179858612596821	0.734607452974466	Mrps26	mitochondrial ribosomal protein S26 Gene [Source:MGI (curated);Acc:Mrps26-001]
895	ENSMUSG00000022425	3.05789	0.00752177	0.136545	1.9152	Enpp2	ectonucleotide pyrophosphatase/phosphodiesterase 2 Gene [Source:MGI Symbol;Acc:MGI:1321390]
896	ENSMUSG00000015094	3.05594	0.00754701	0.136669	1.22467	Npdc1	neural proliferation, differentiation and control gene 1 Gene [Source:MGI (curated);Acc:Npdc1-006]
897	ENSMUSG00000024712	3.05571	0.00755542	0.136669	1.20516	Rfk	riboflavin kinase Gene [Source:MGI (curated);Acc:Rfk-001]
898	ENSMUSG00000050410	3.0547	0.00755963	0.136669	1.28547	Tcf19	transcription factor 19 Gene [Source:MGI Symbol;Acc:MGI:103180]
899	ENSMUSG00000029462	3.05469	0.00756384	0.136669	1.19681	Vps29	vacuolar protein sorting 29 (S. pombe) Gene [Source:MGI (curated);Acc:Vps29-002]
900	ENSMUSG00000053040	3.05451	0.00756805	0.136669	1.47602	Aph1c	anterior pharynx defective 1c homolog (C. elegans) Gene [Source:MGI Symbol;Acc:MGI:1915568]
901	ENSMUSG00000024671	3.05419	0.00757646	0.136694	1.20806	AC134839.3
902	ENSMUSG00000071715	3.05244	0.0076017	0.136971	1.39877	Ncf4	neutrophil cytosolic factor 4 Gene [Source:MGI (curated);Acc:Ncf4-001]
903	ENSMUSG00000032966	3.05136	0.00760591	0.136971	1.27586	Fkbp1a	FK506 binding protein 1a Gene [Source:MGI (curated);Acc:Fkbp1a-001]
904	ENSMUSG00000007987	3.04904	0.00763115	0.137171	1.25174	Rabl5	RAB, member of RAS oncogene family-like 5 Gene [Source:MGI Symbol;Acc:MGI:1914536]
905	ENSMUSG00000001588	3.04686	0.00766901	0.137418	1.15053	Centb1	ArfGAP with coiled-coil, ankyrin repeat and PH domains 1 Gene [Source:MGI (curated);Acc:Centb1-001]
